# Supplementary material
Source: bioRxiv or medRxiv preprint supplement (https://www.biorxiv.org/highwire/filestream/108745/field_highwire_adjunct_files/4/359539-5.pdf)
Supplement: Supplementary file [file 359539-5.pdf]

## all TFs

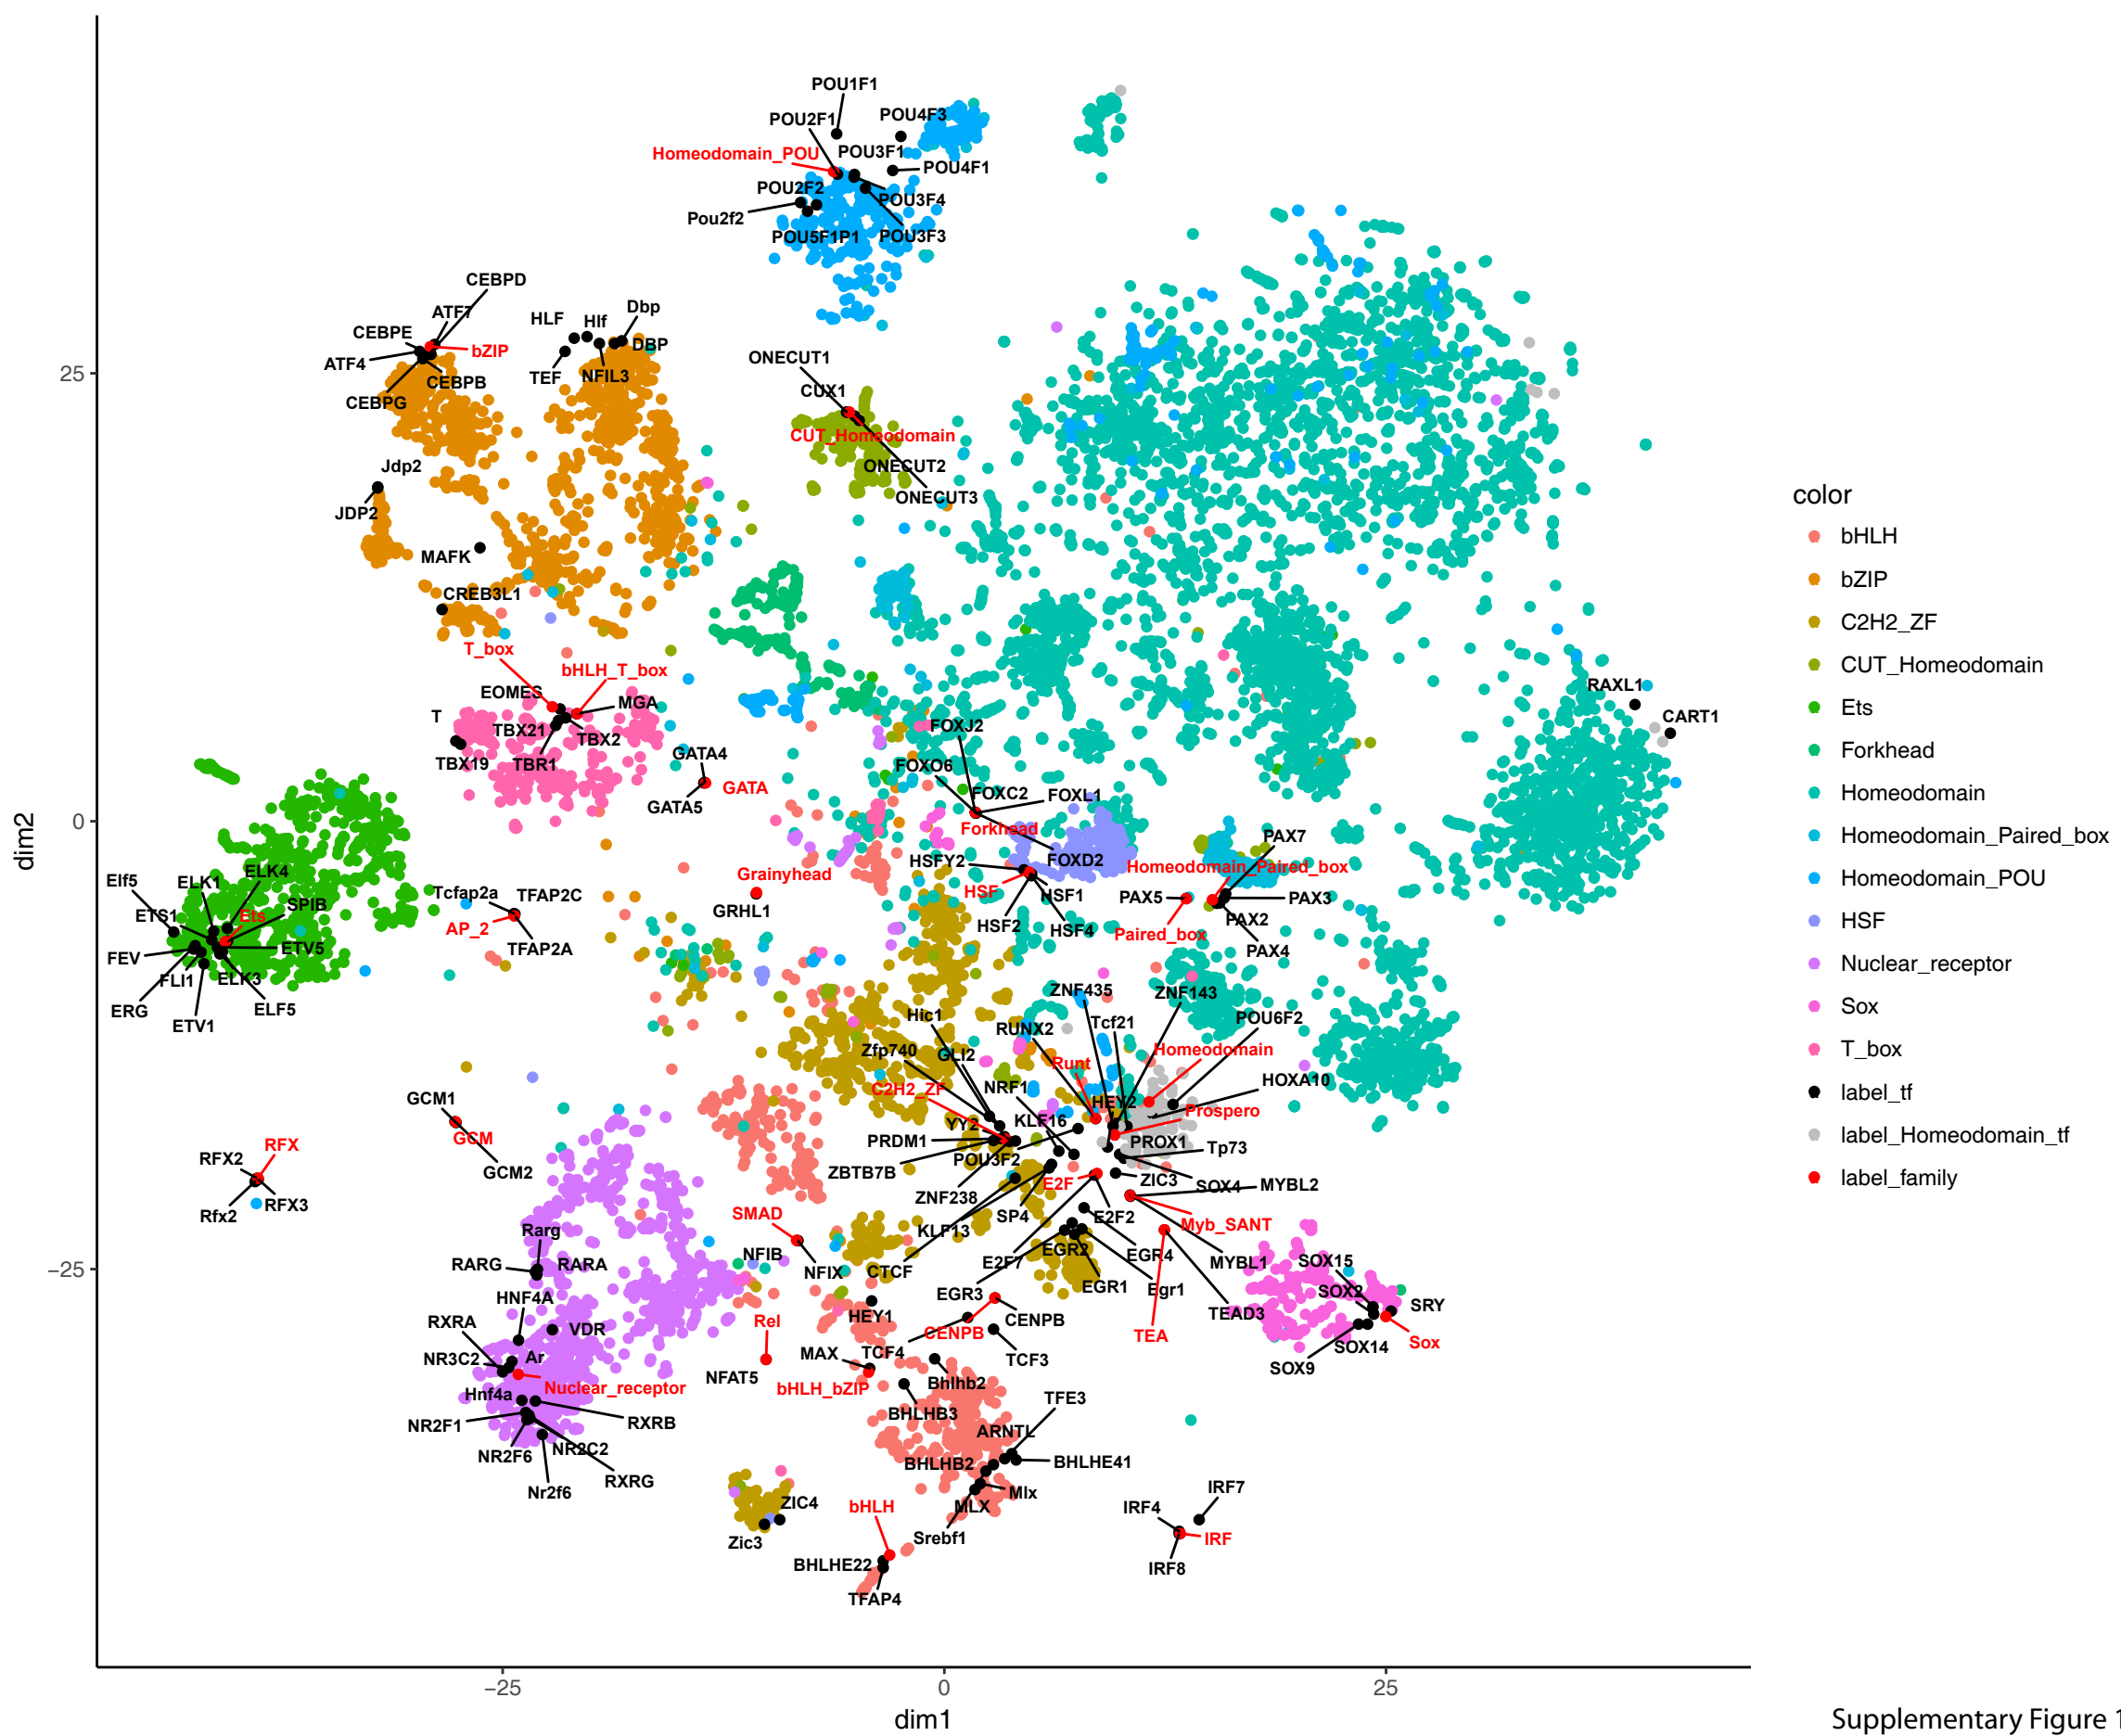

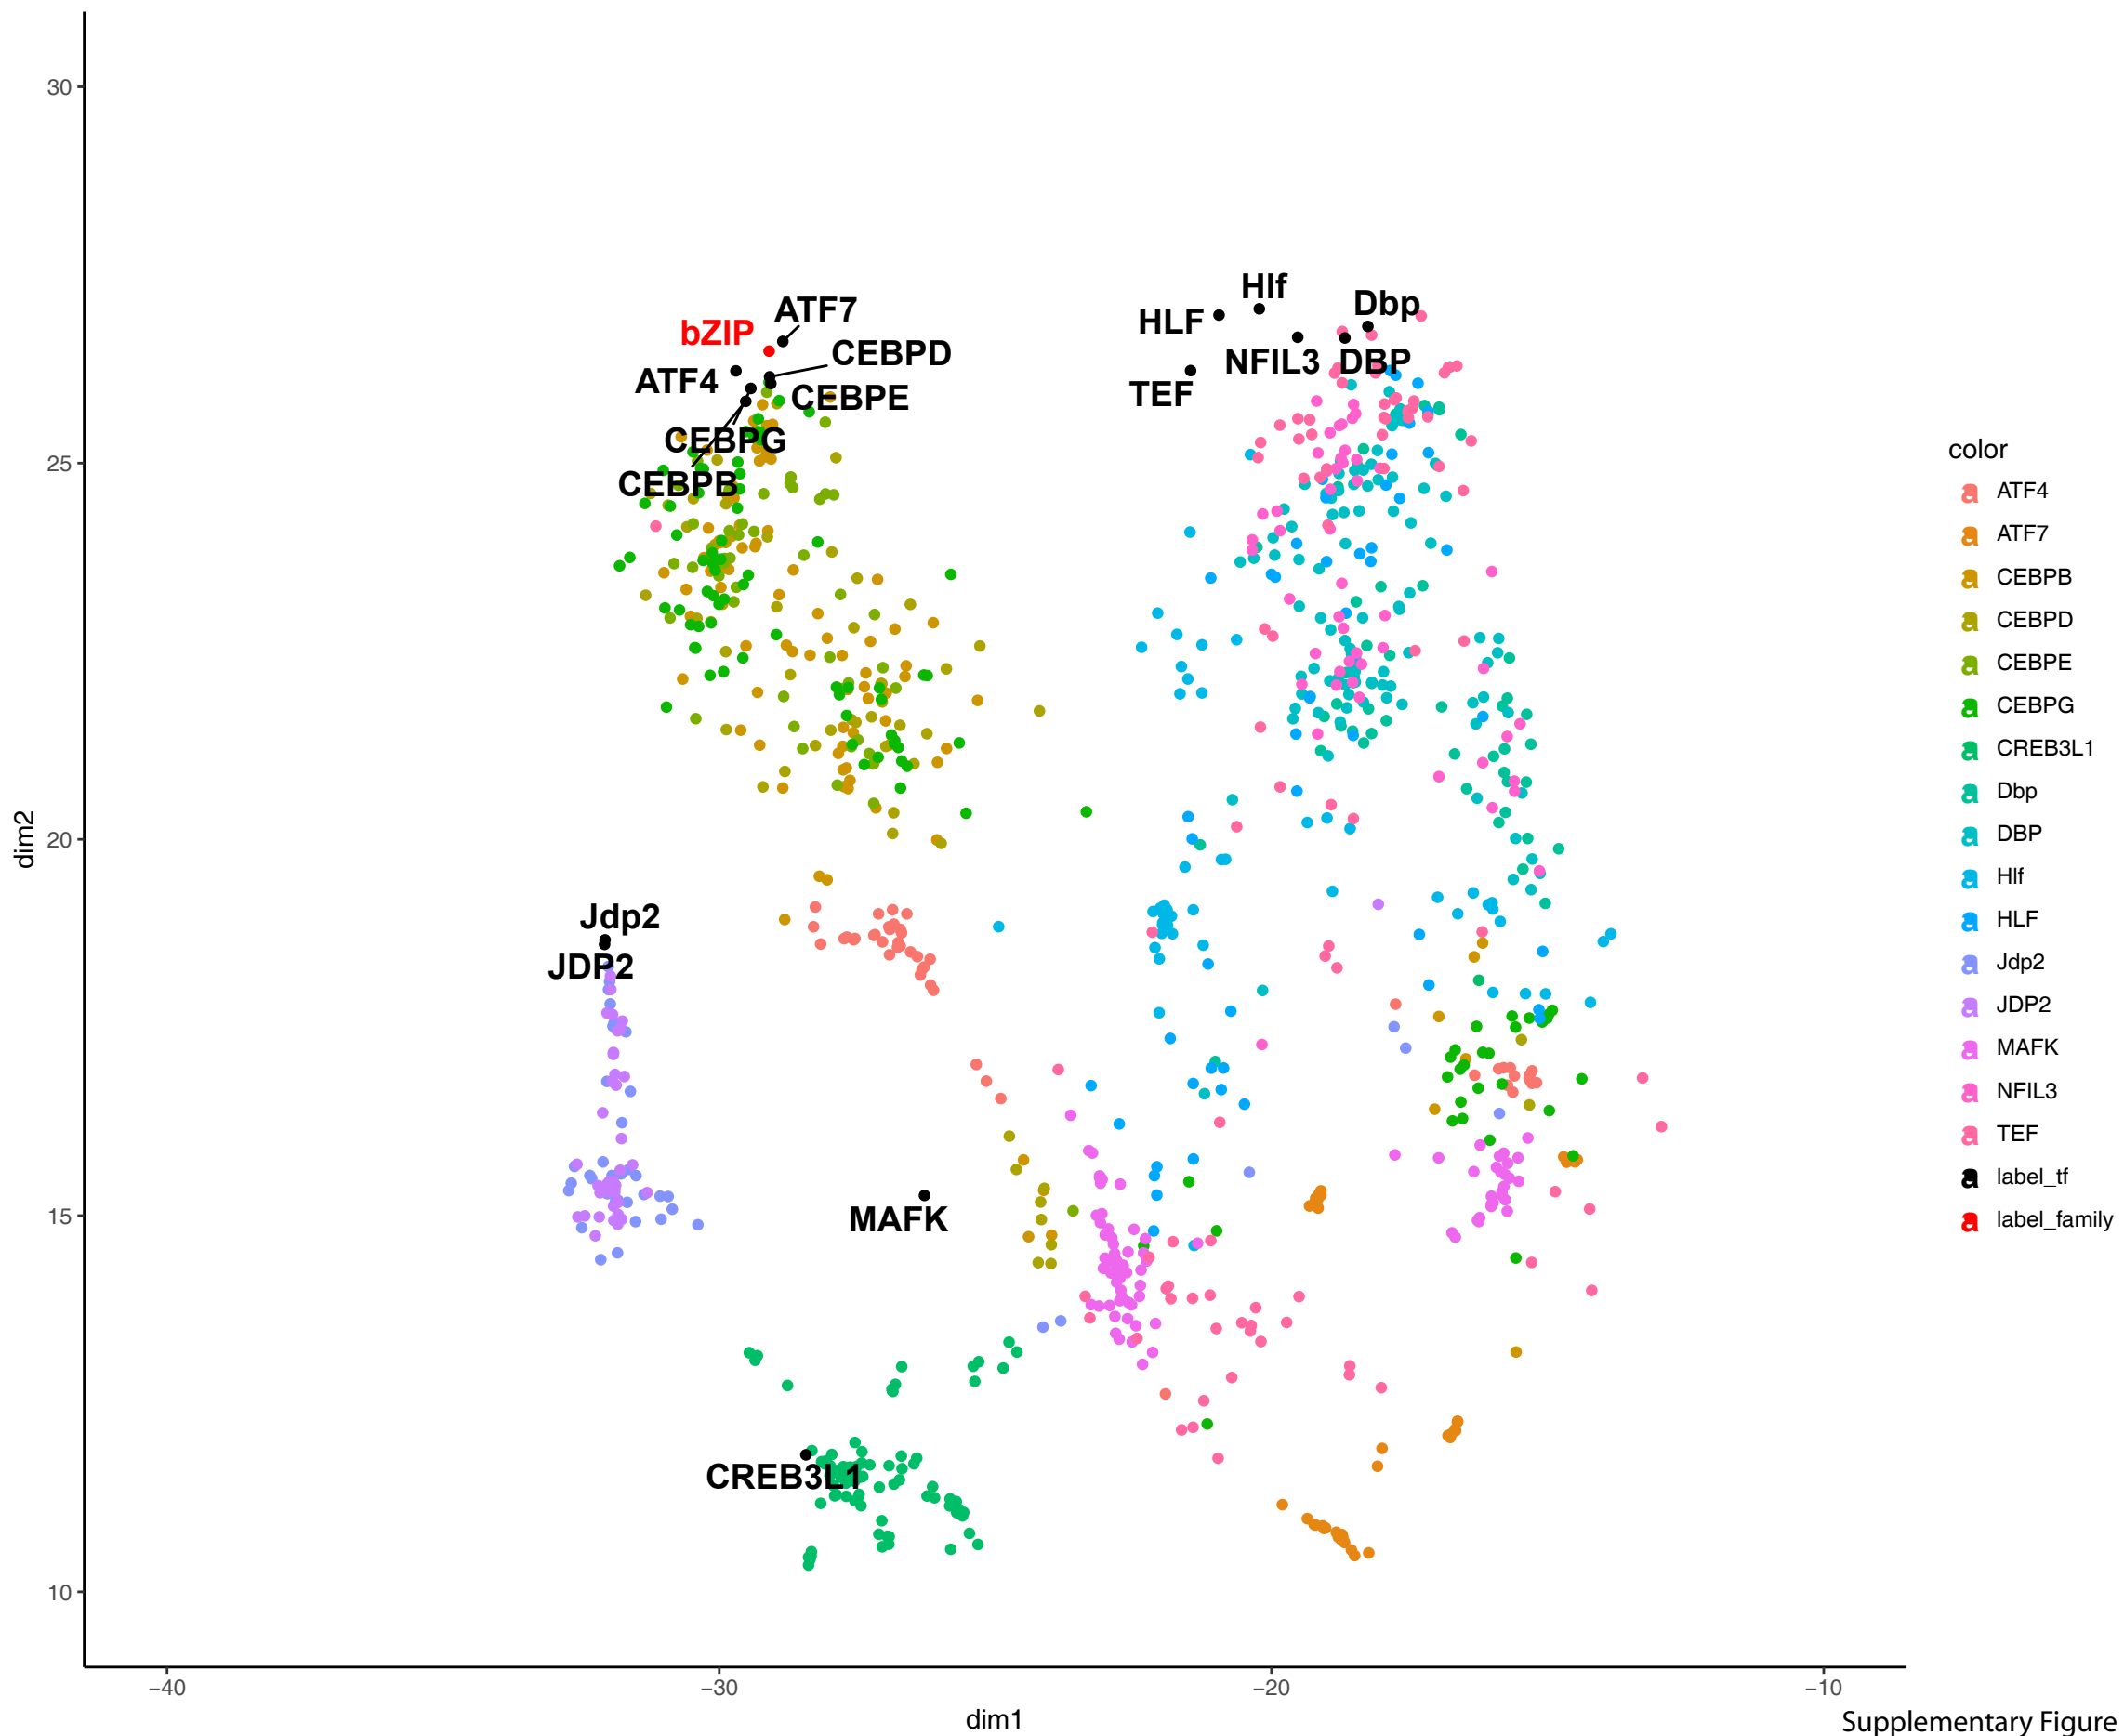

### bHLH

Motif

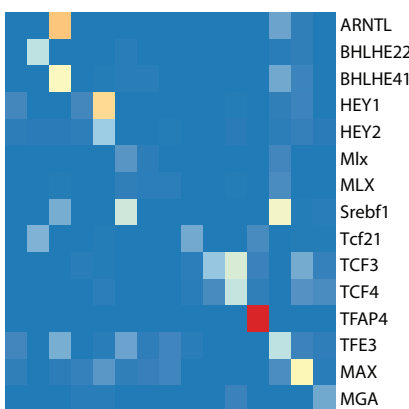

BindSpace

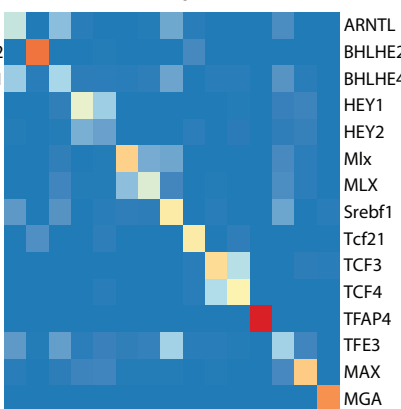

### bZIP

Motif

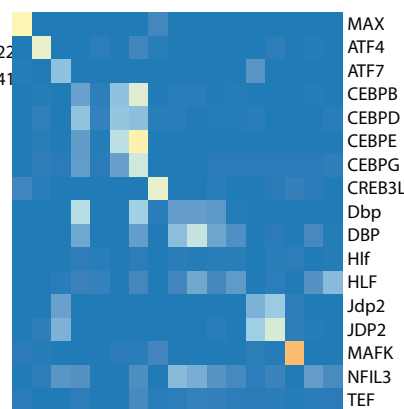

BindSpace

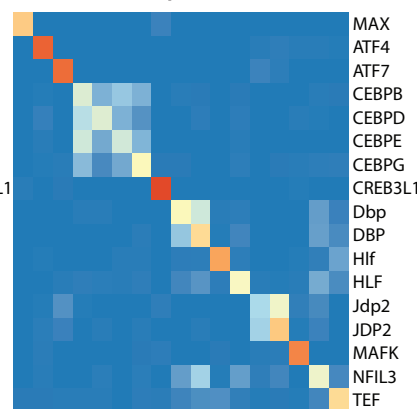

### C2H2\_ZF

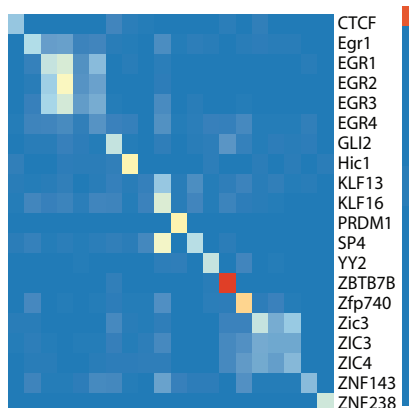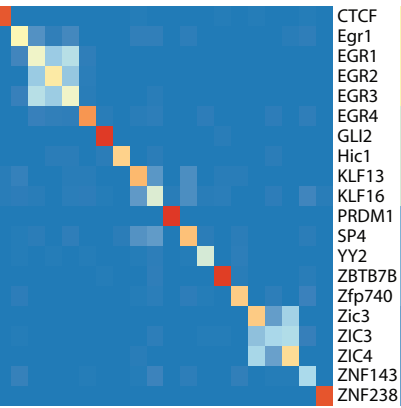

### CUT\_Homeodomain

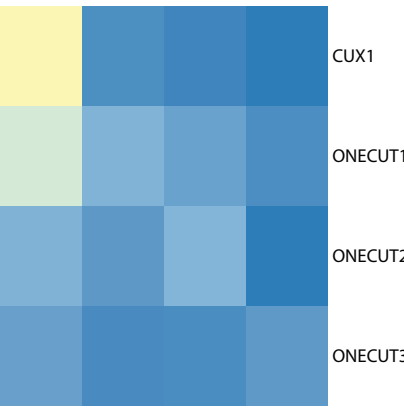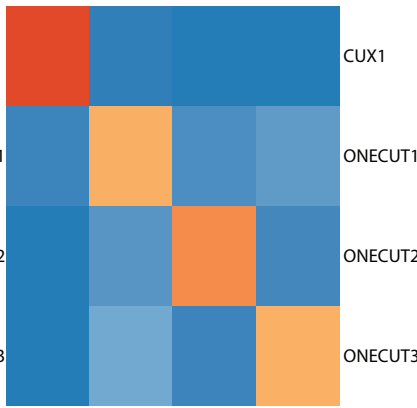

### Ets

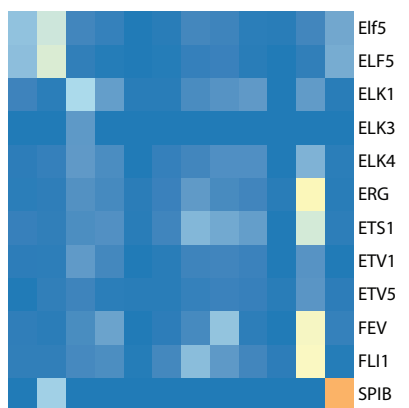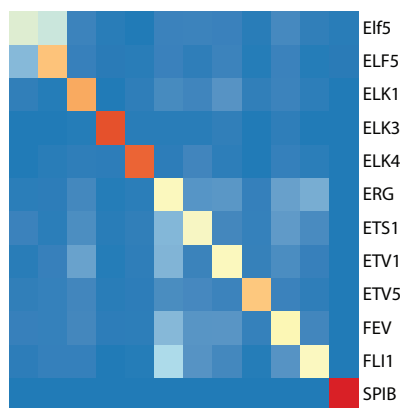

### Forkhead

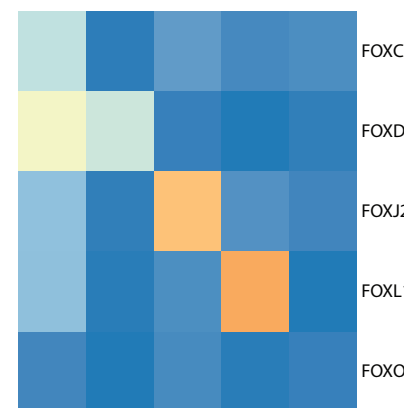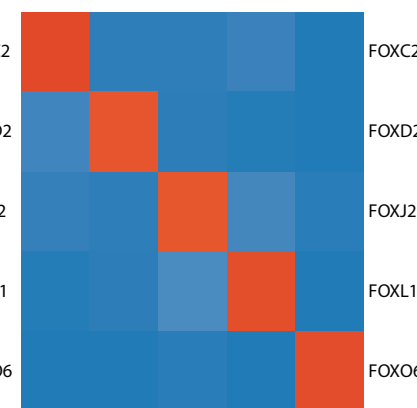

### Homeodomain\_Paired\_box

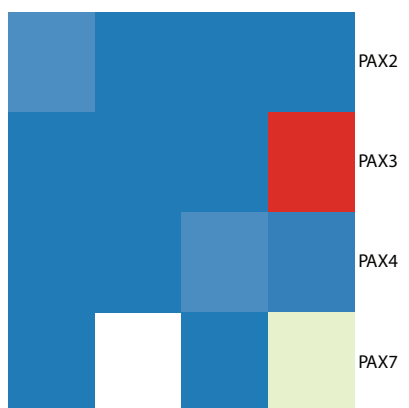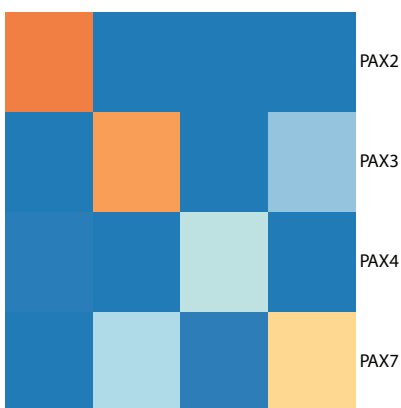

### Homeodomain\_POU

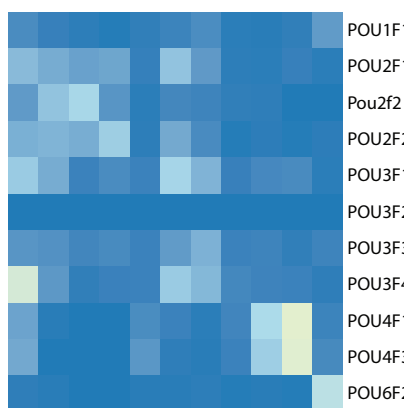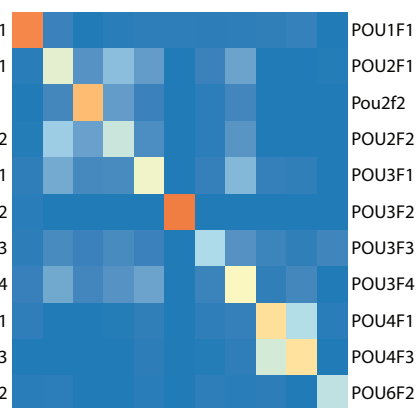

Motif

BindSpace

Motif

BindSpace

HSF

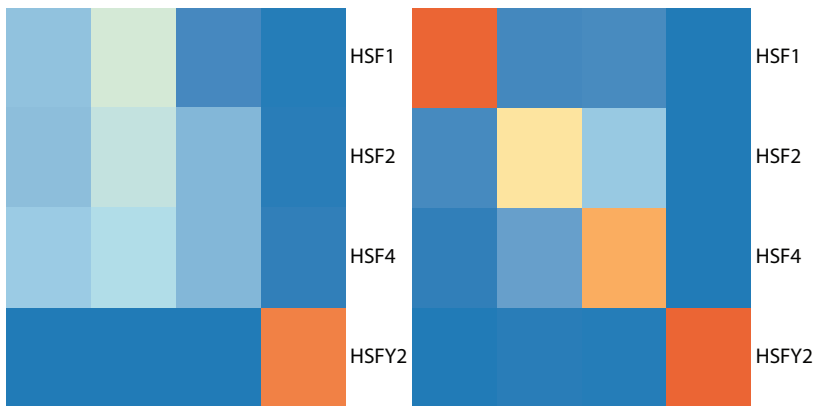

Nuclear\_receptor

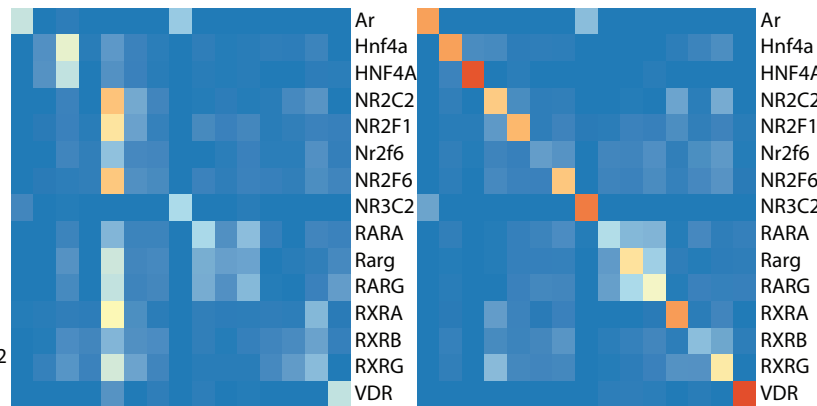

SOX

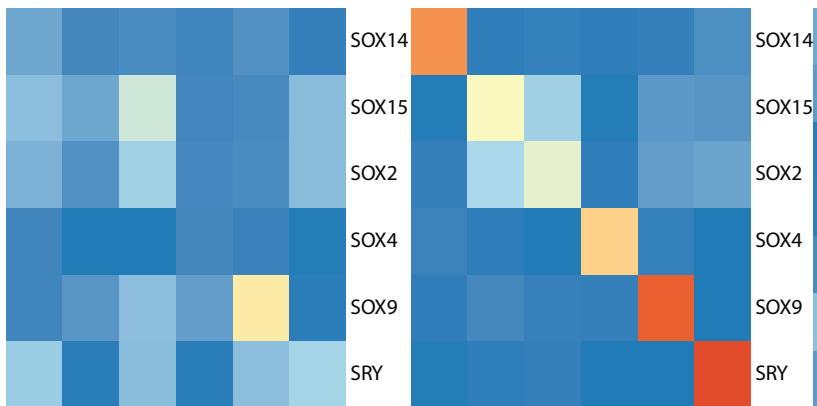

T\_box

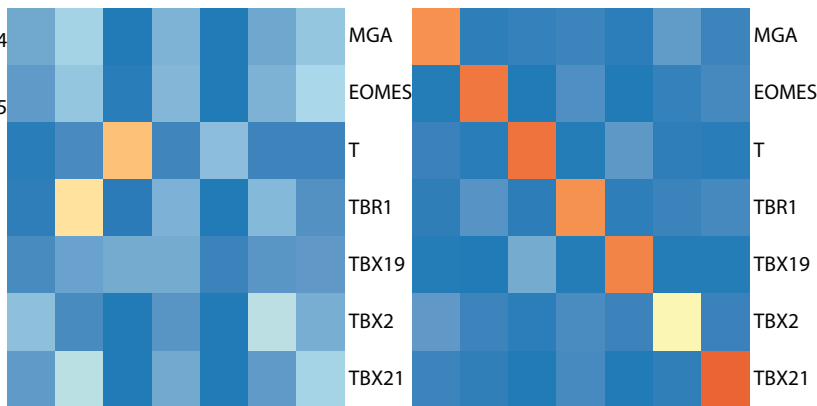

Motif

BindSpace

Motif

BindSpace

Homeodomain

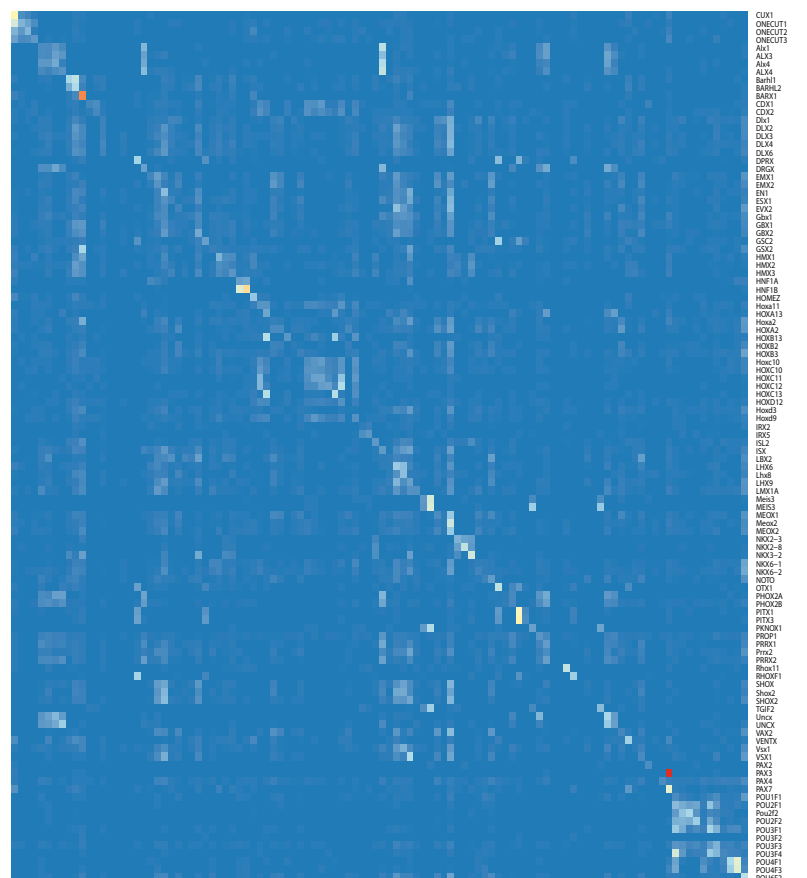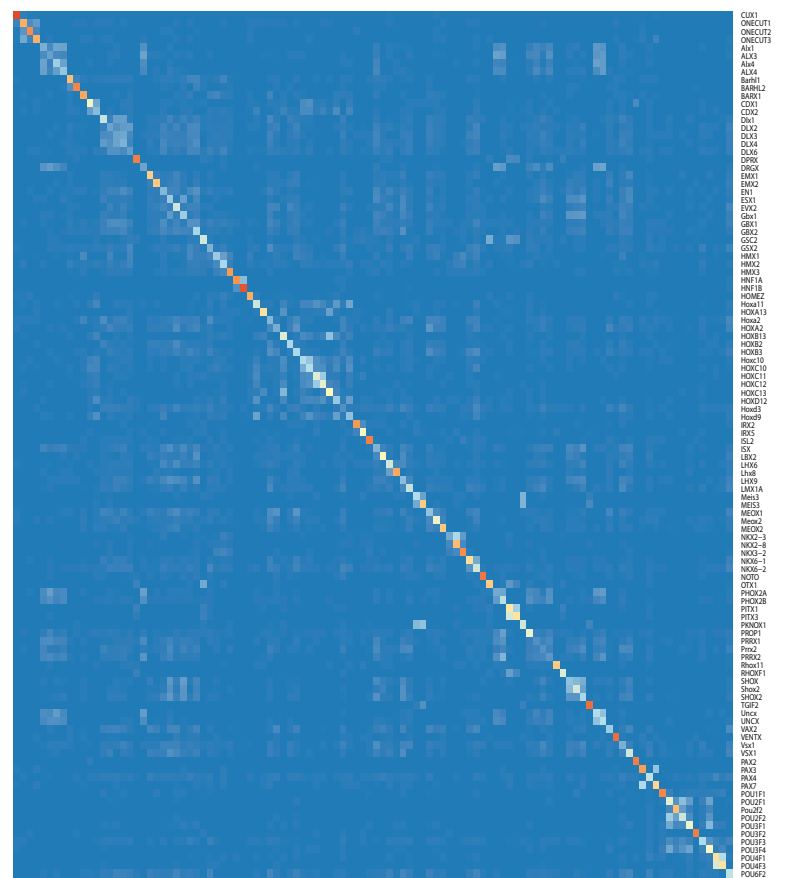

Motif

BindSpace



**EGR2**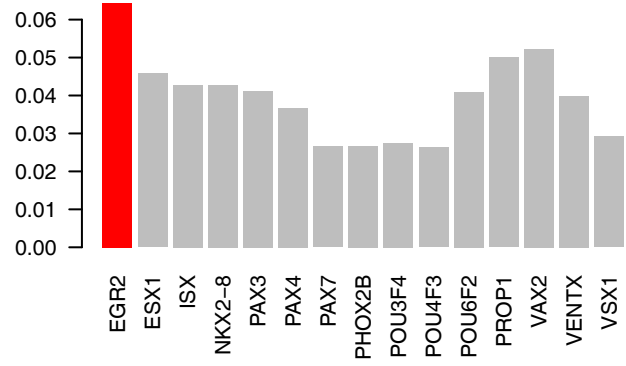**ESX1**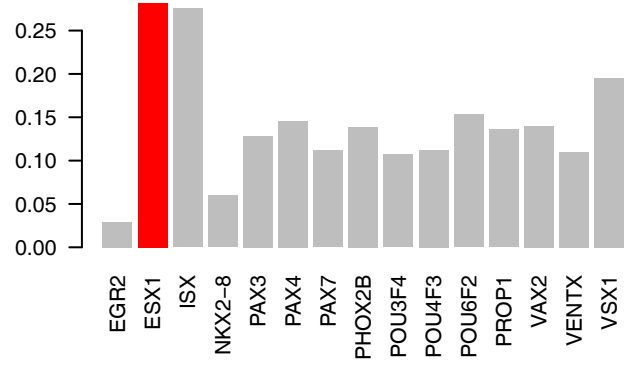**ISX**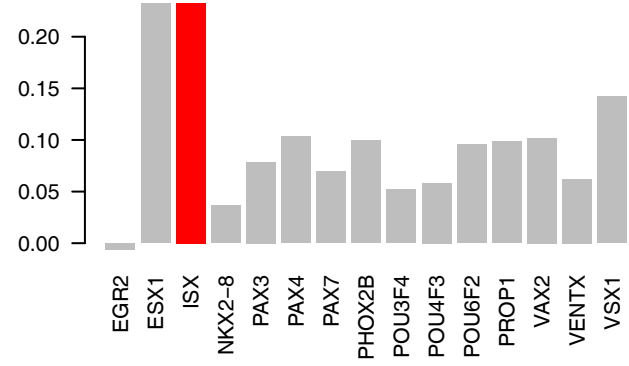**NKX2-8**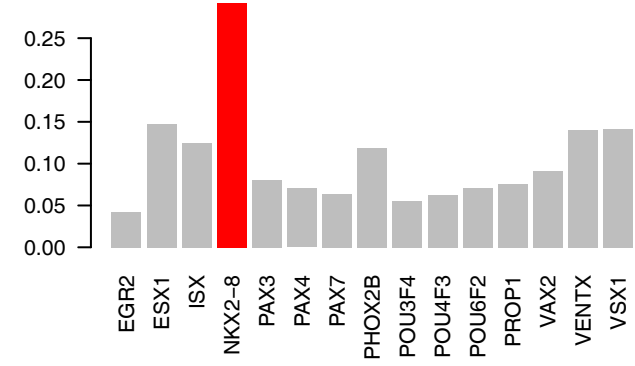**PAX3**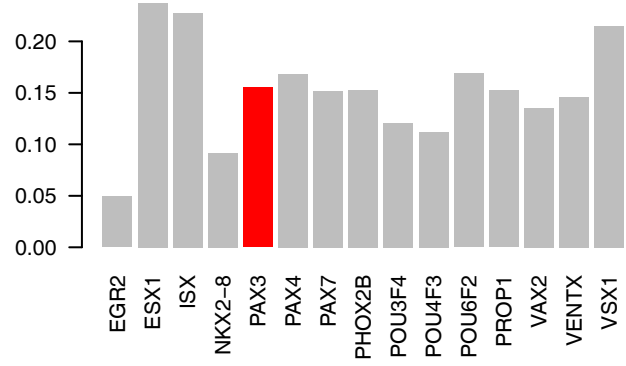**PAX4**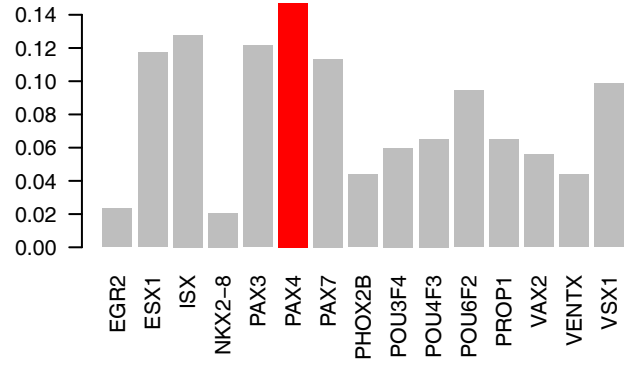**PAX7**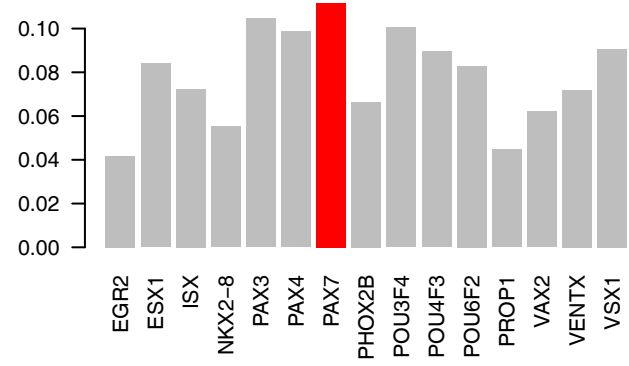**PHOX2B**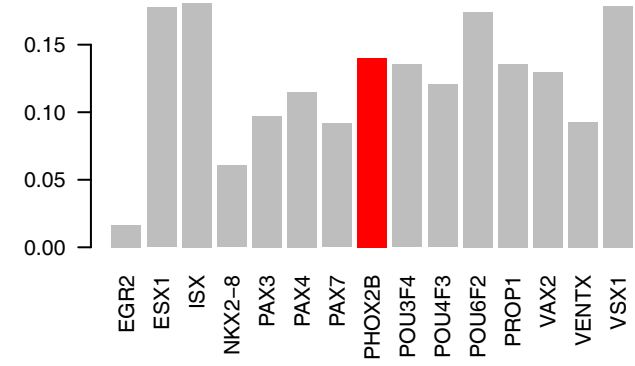**POU3F4**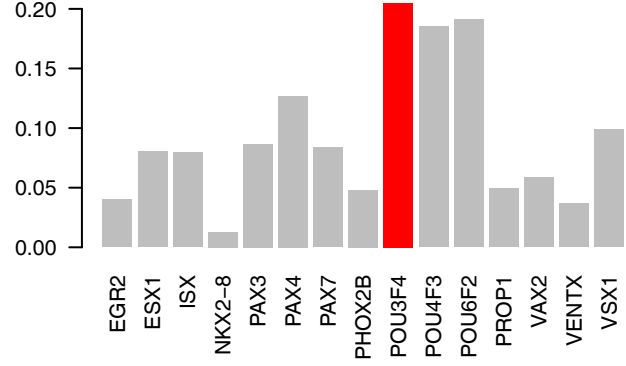**POU4F3**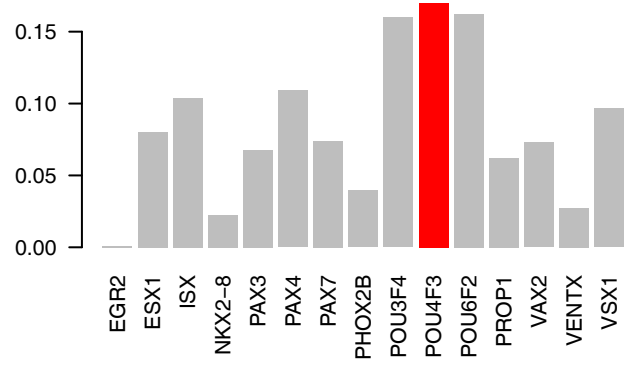**POU6F2**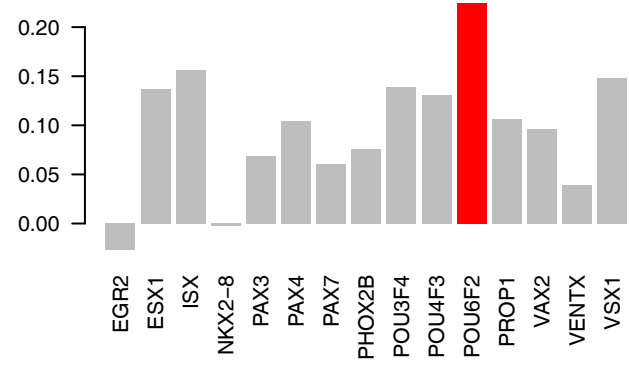**PROP1**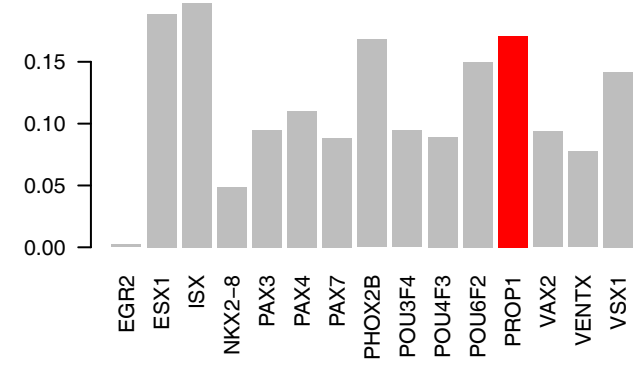**VAX2**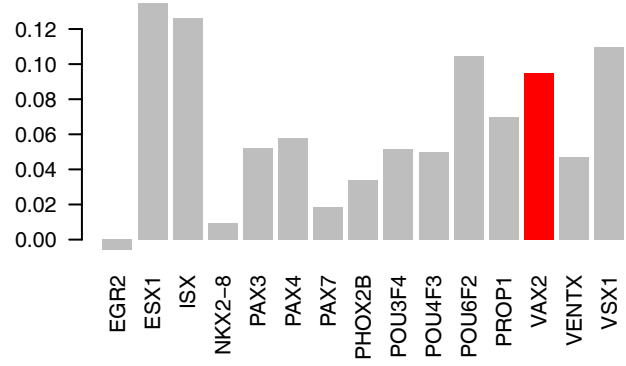**VENTX**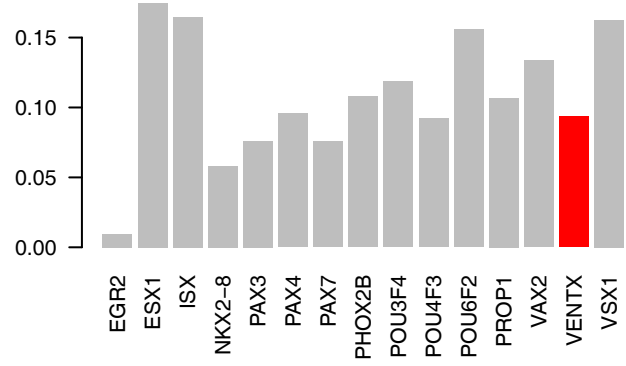**VSX1**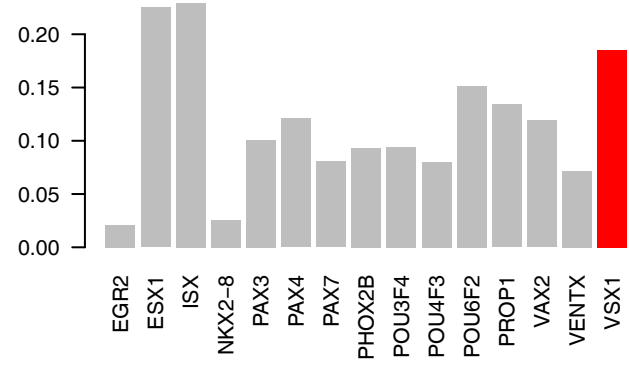

**a**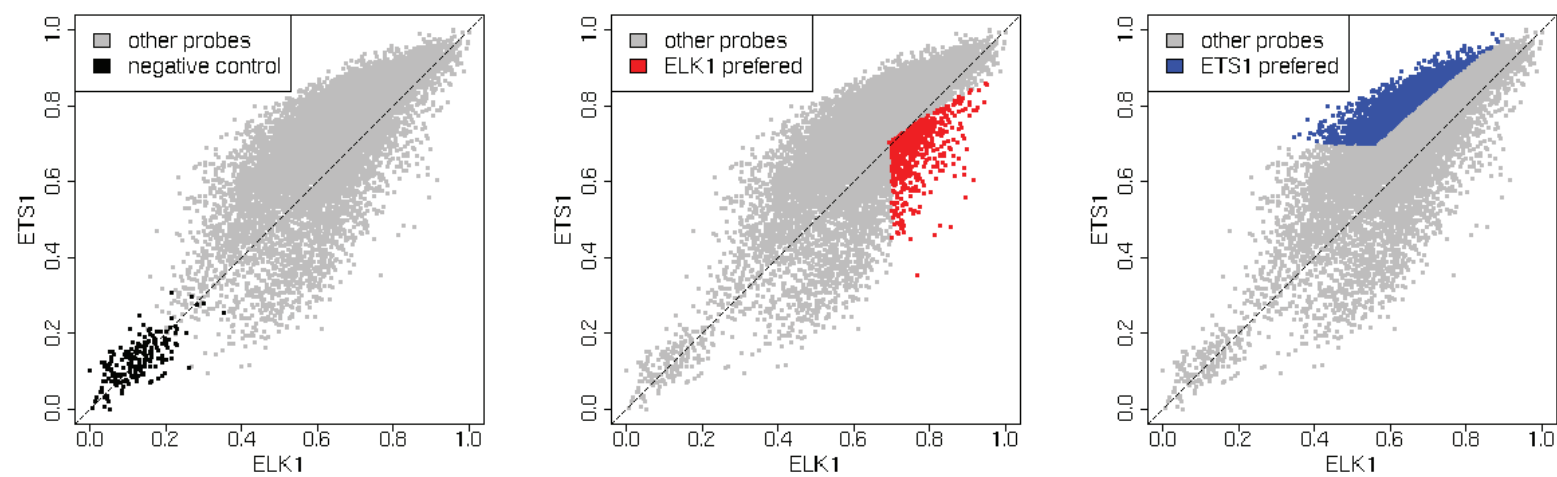**b**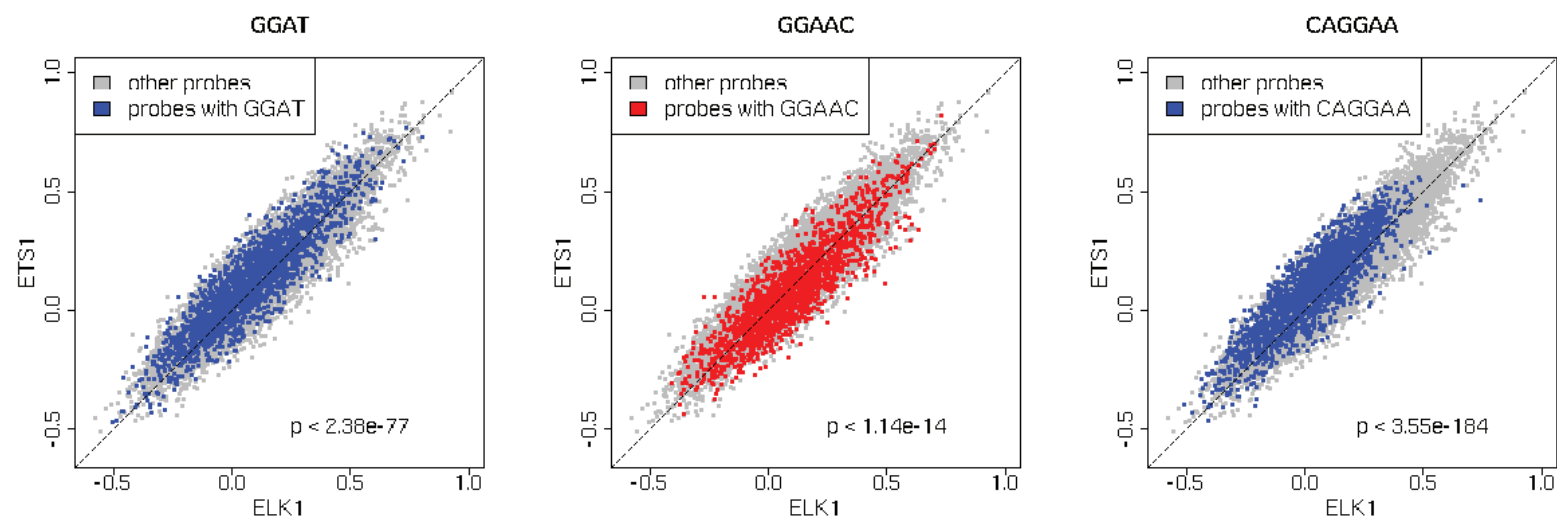

Supplementary Figure 6

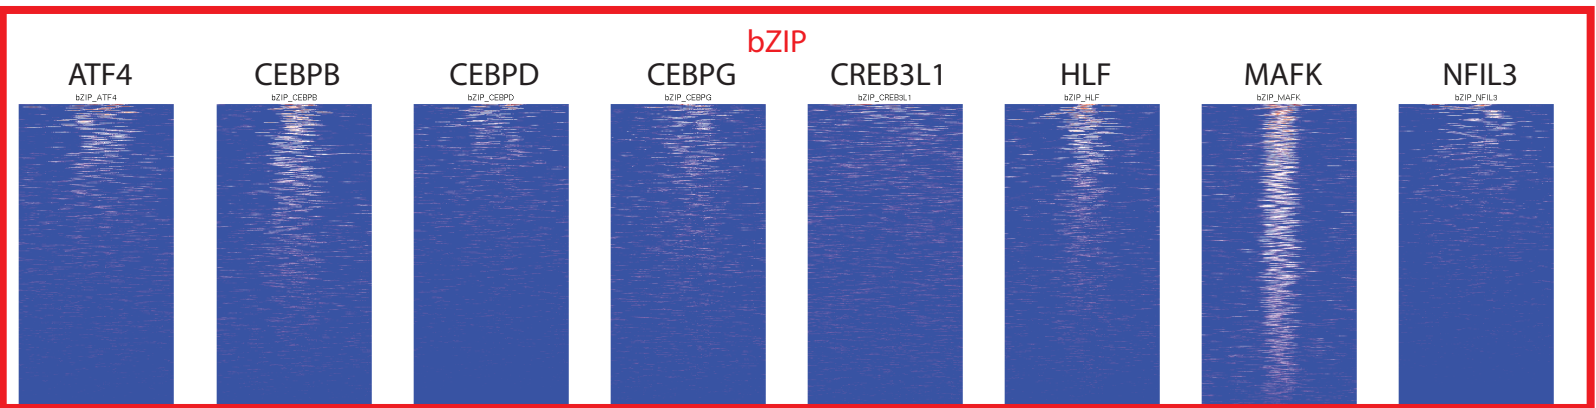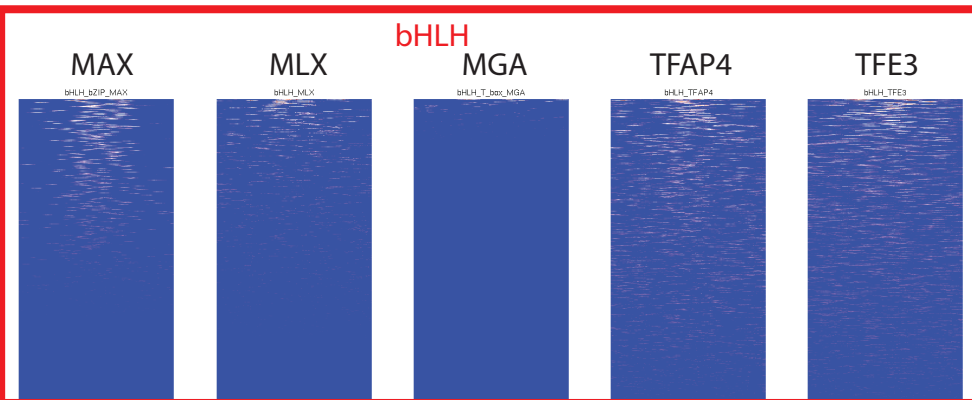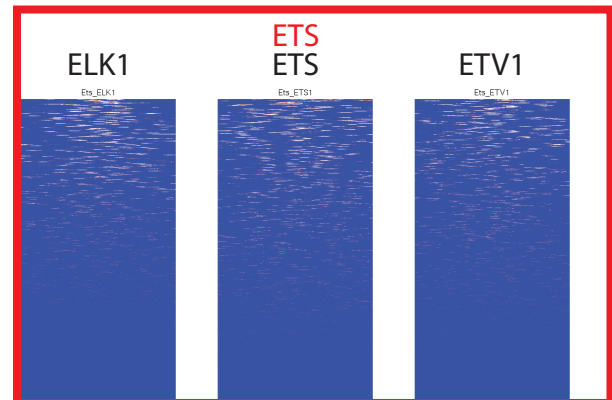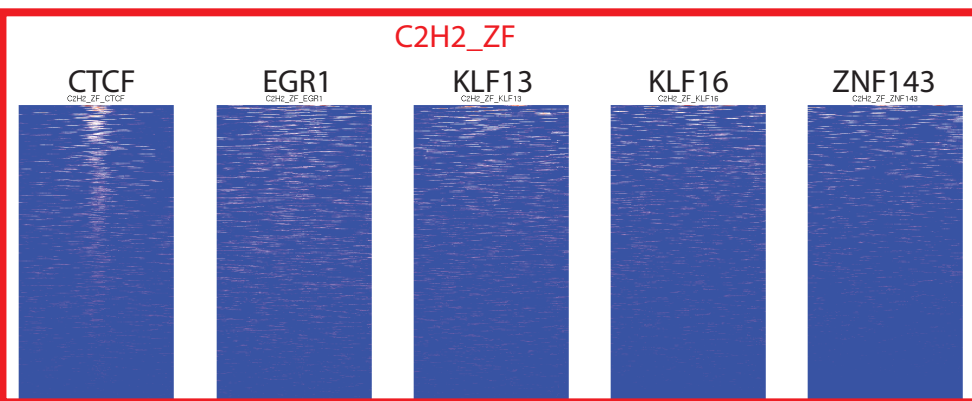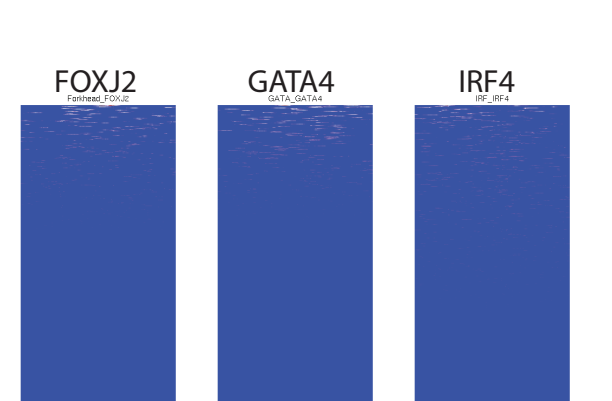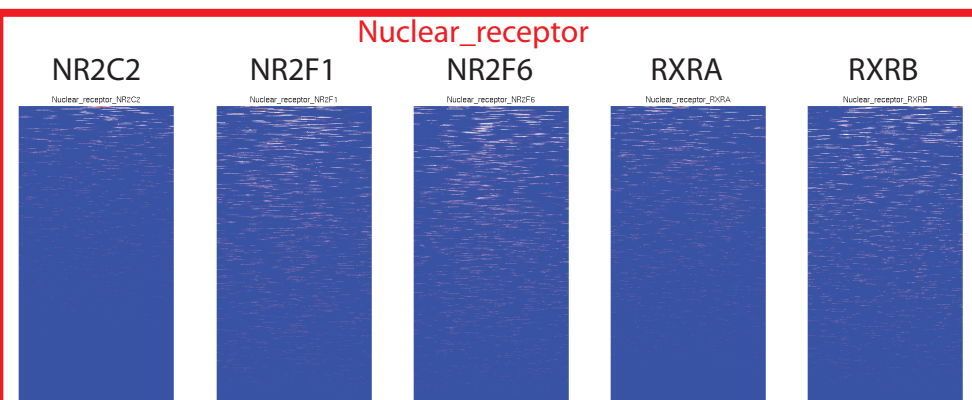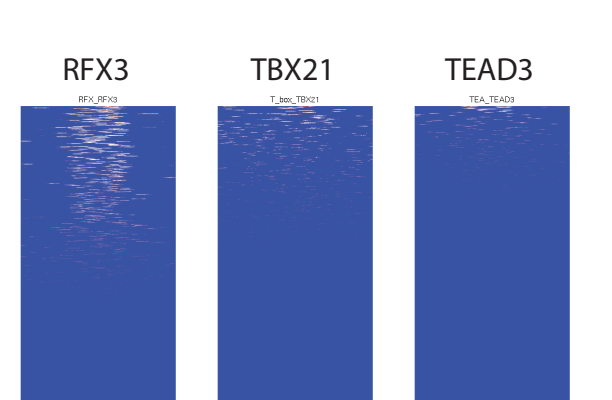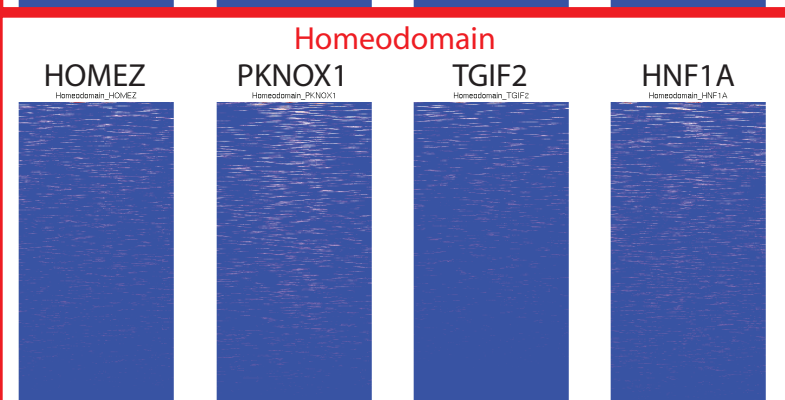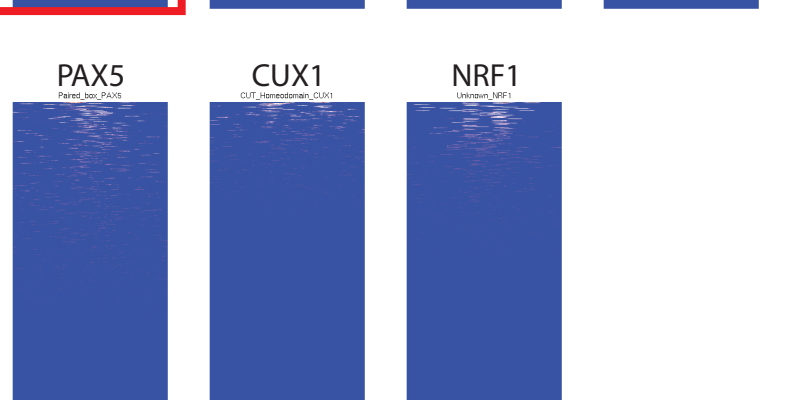

# starspace vs. motif

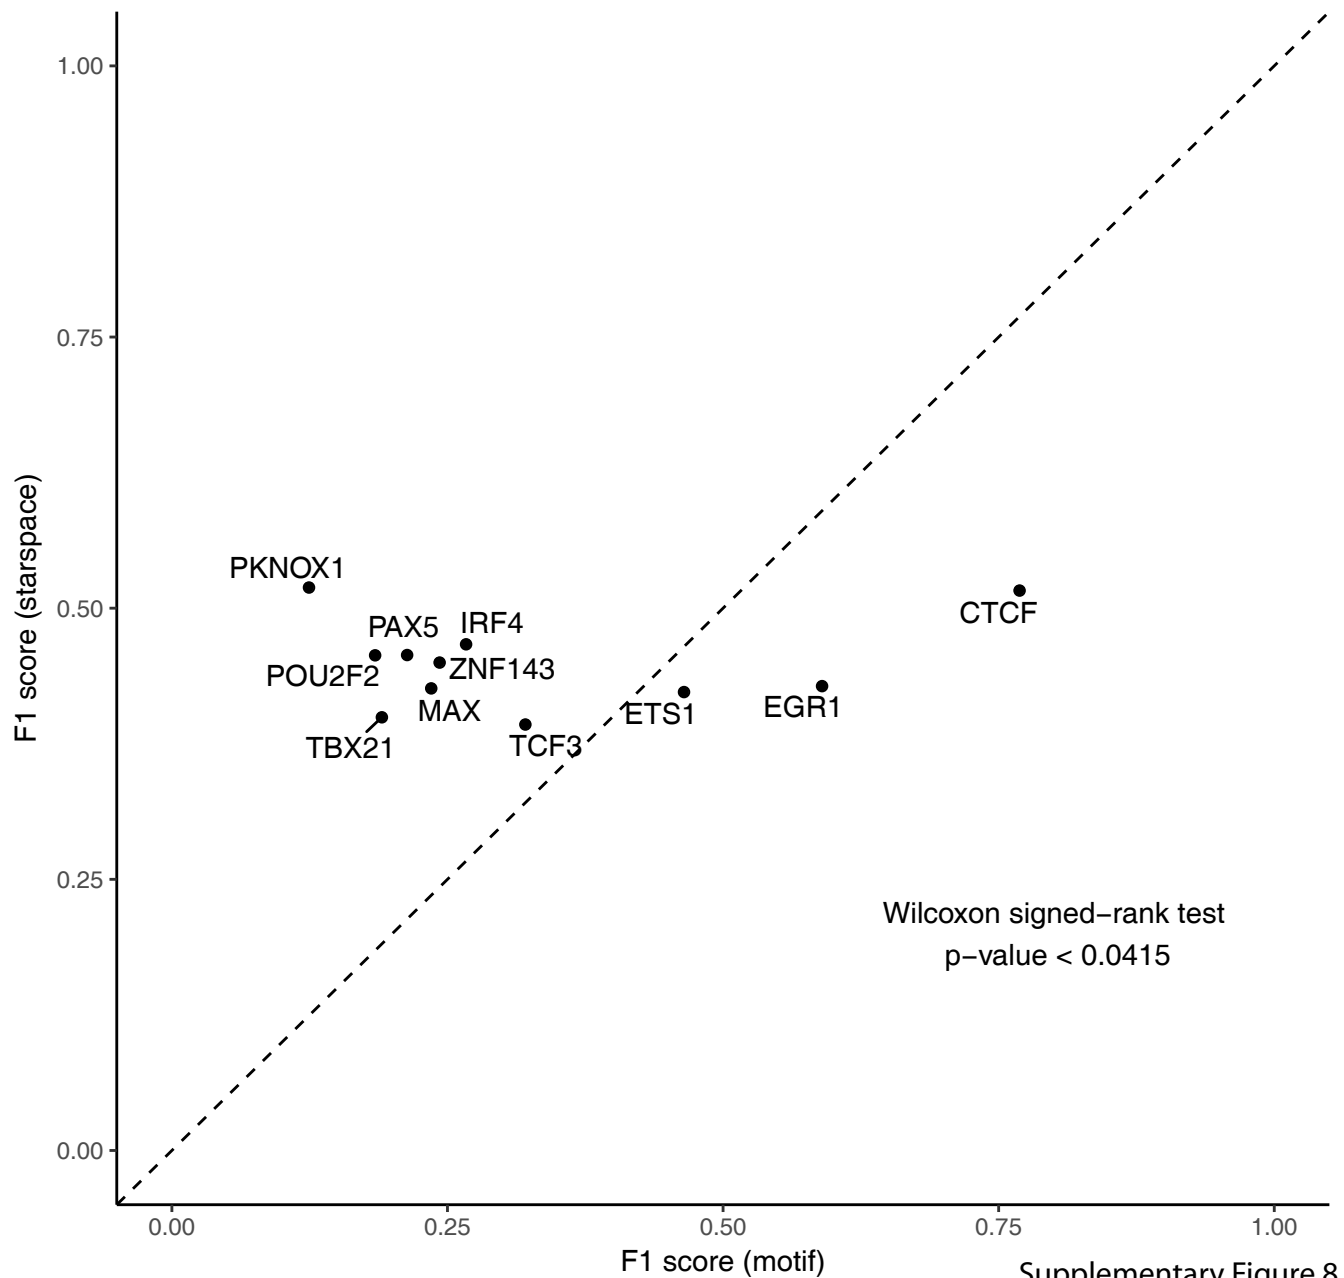

## HepG2

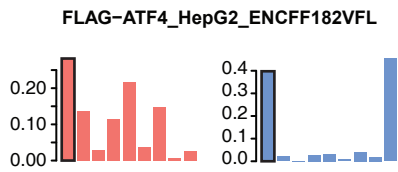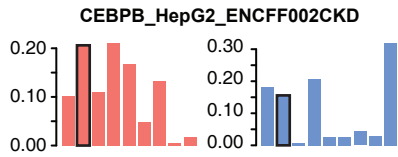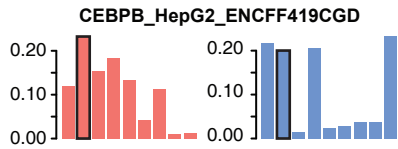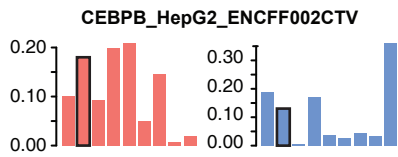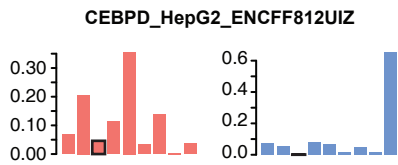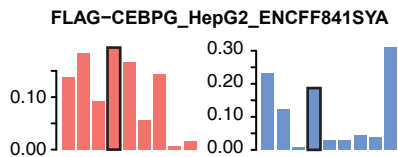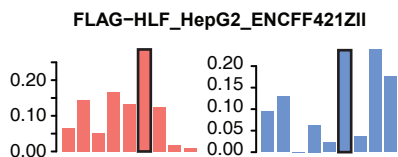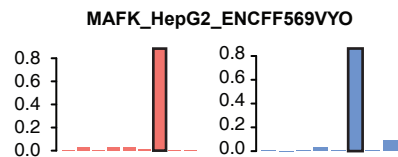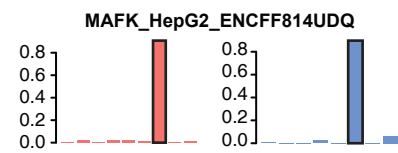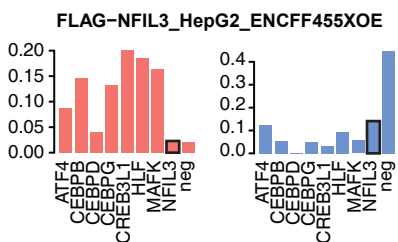

## K562

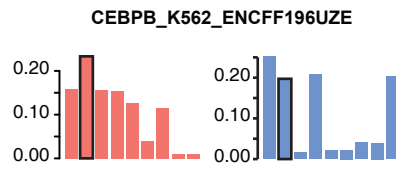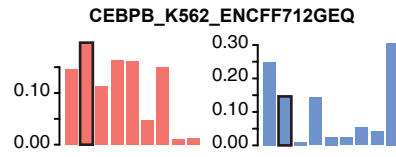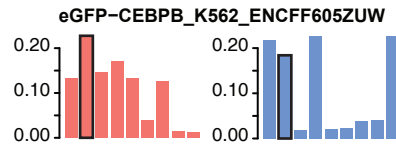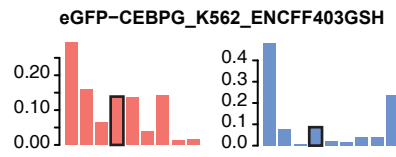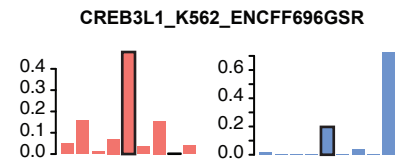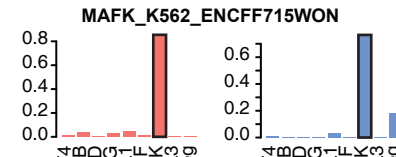

## CEBPB

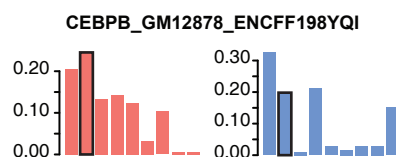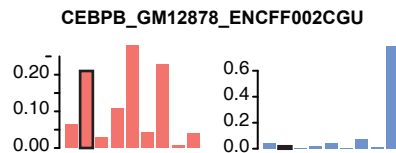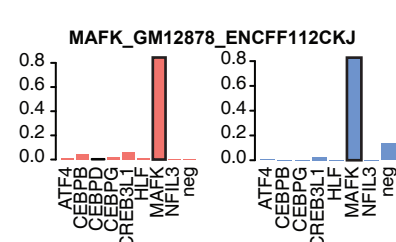

## H1-ESC

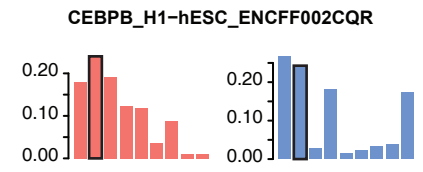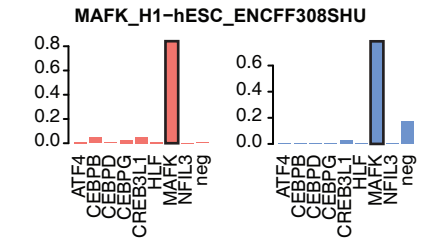

## A549

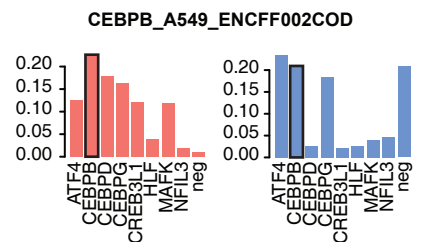

Histogram of corrs

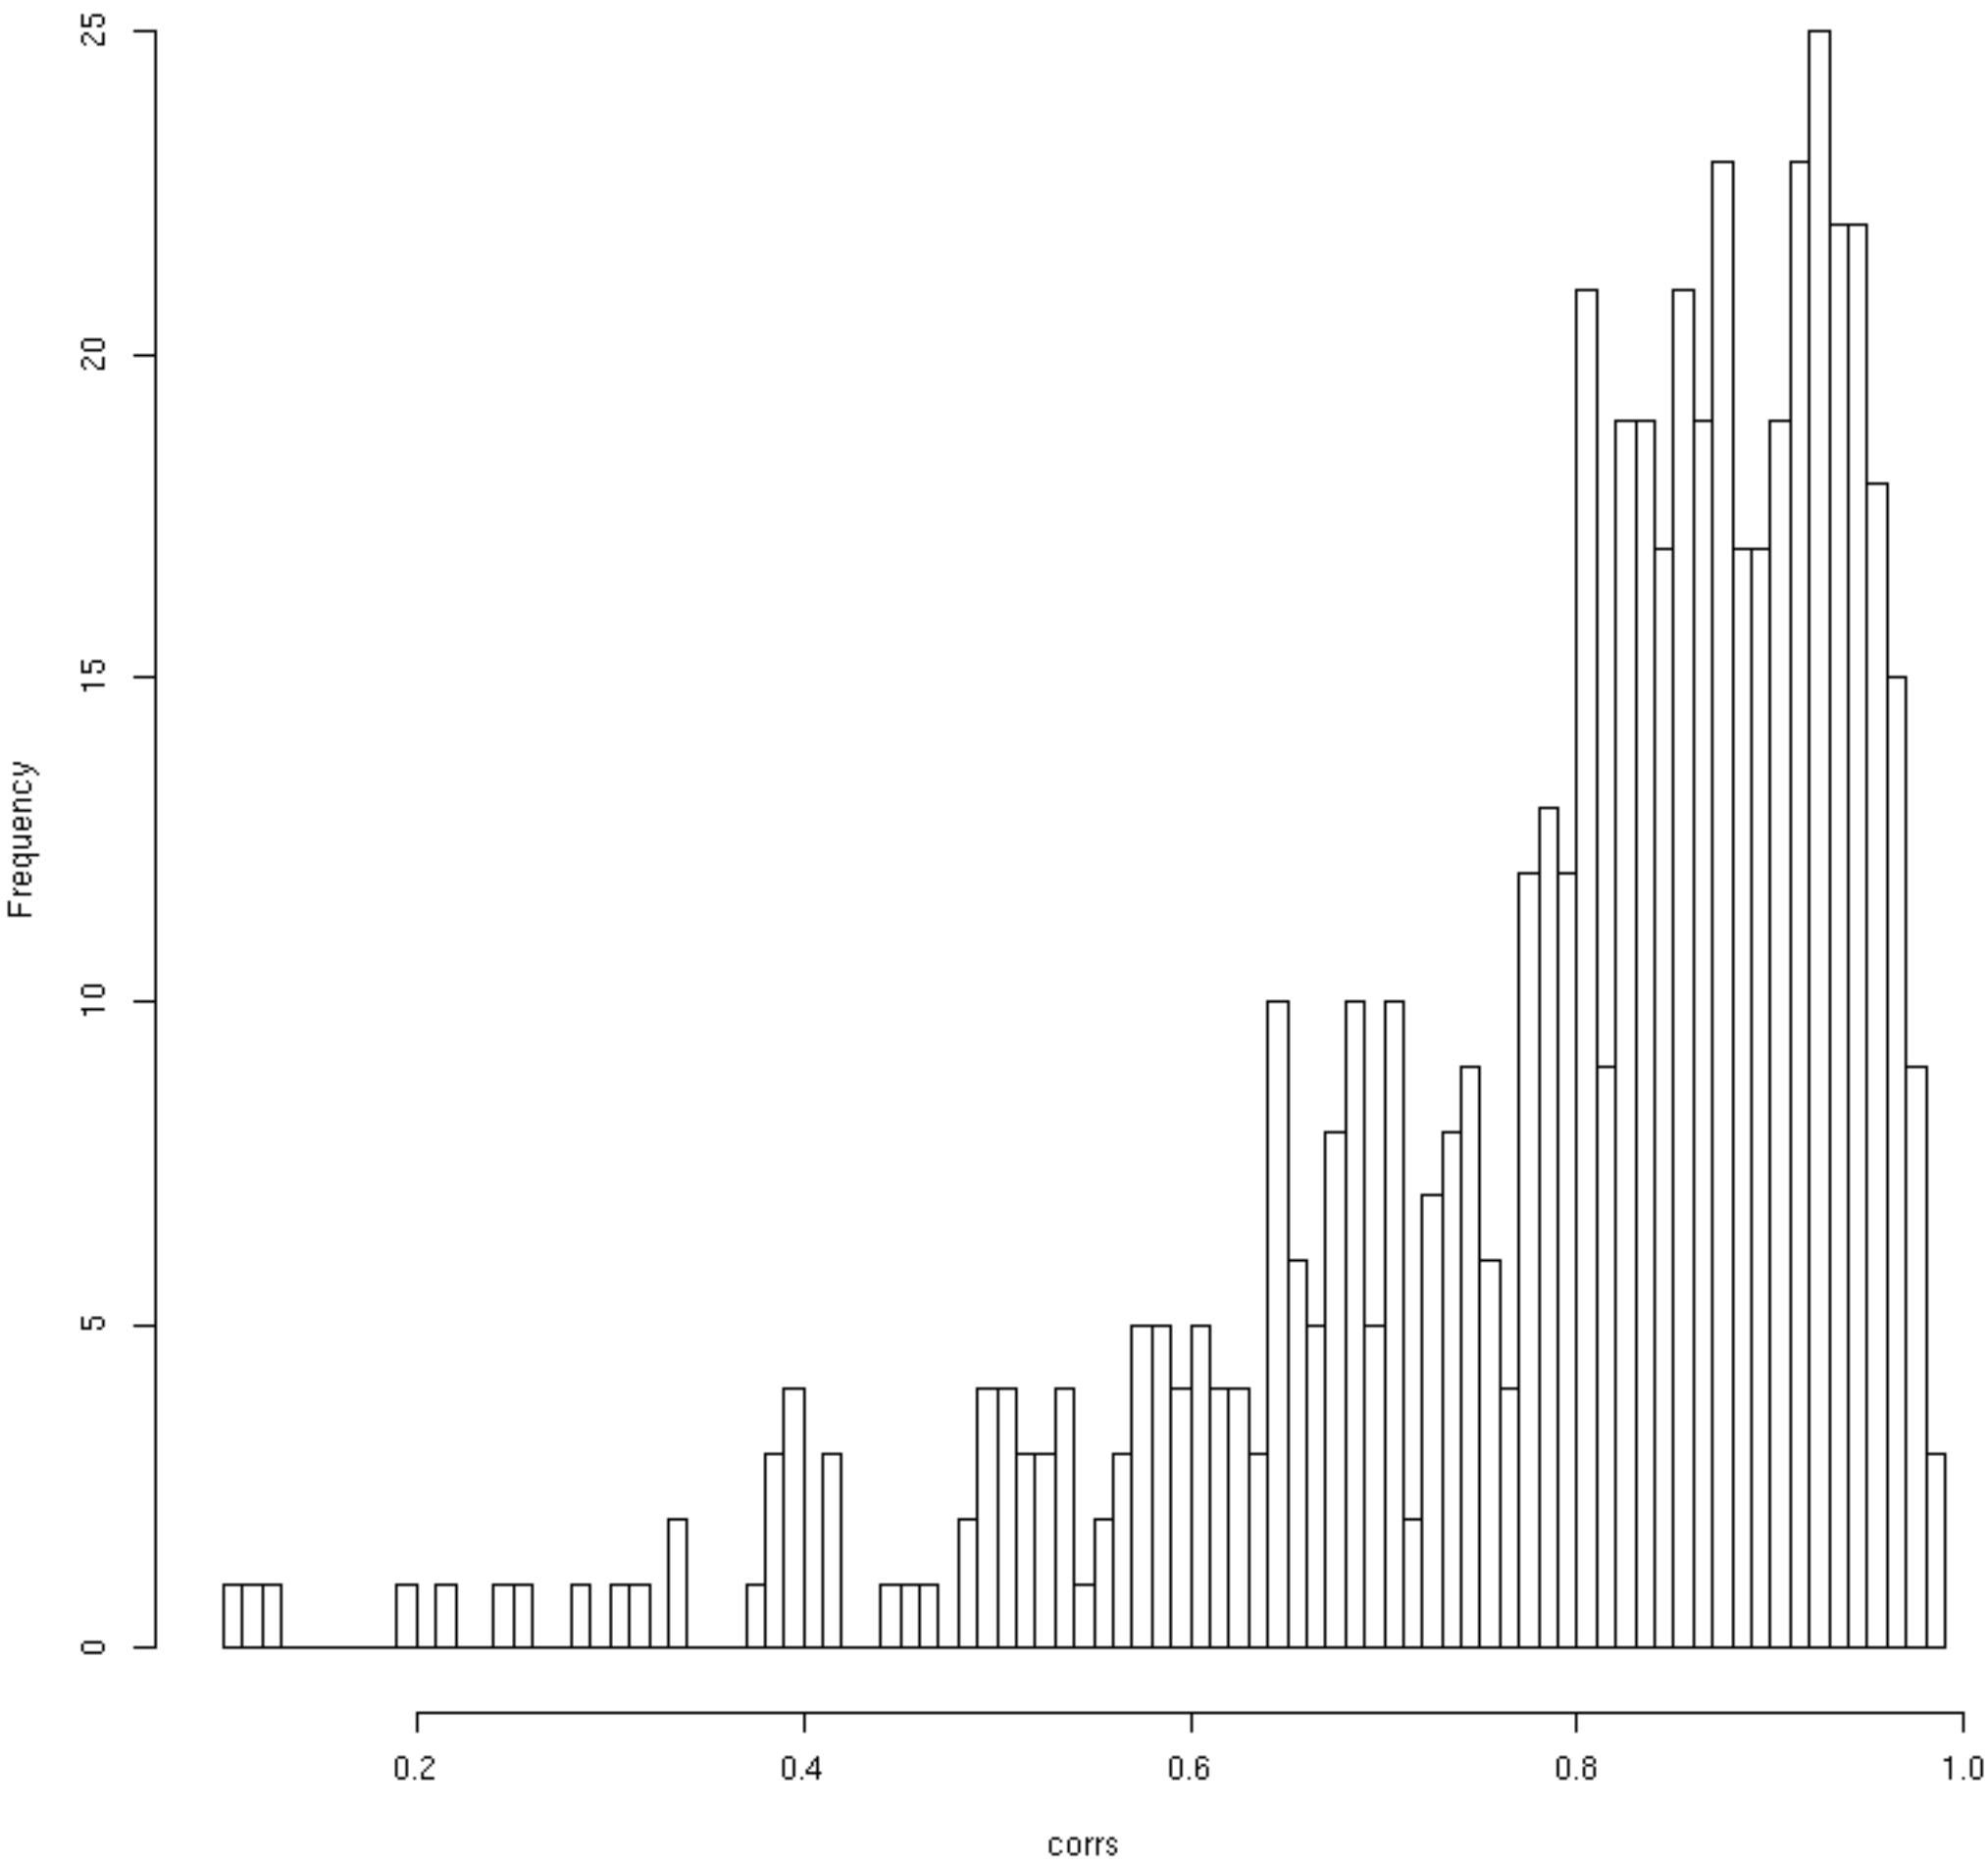

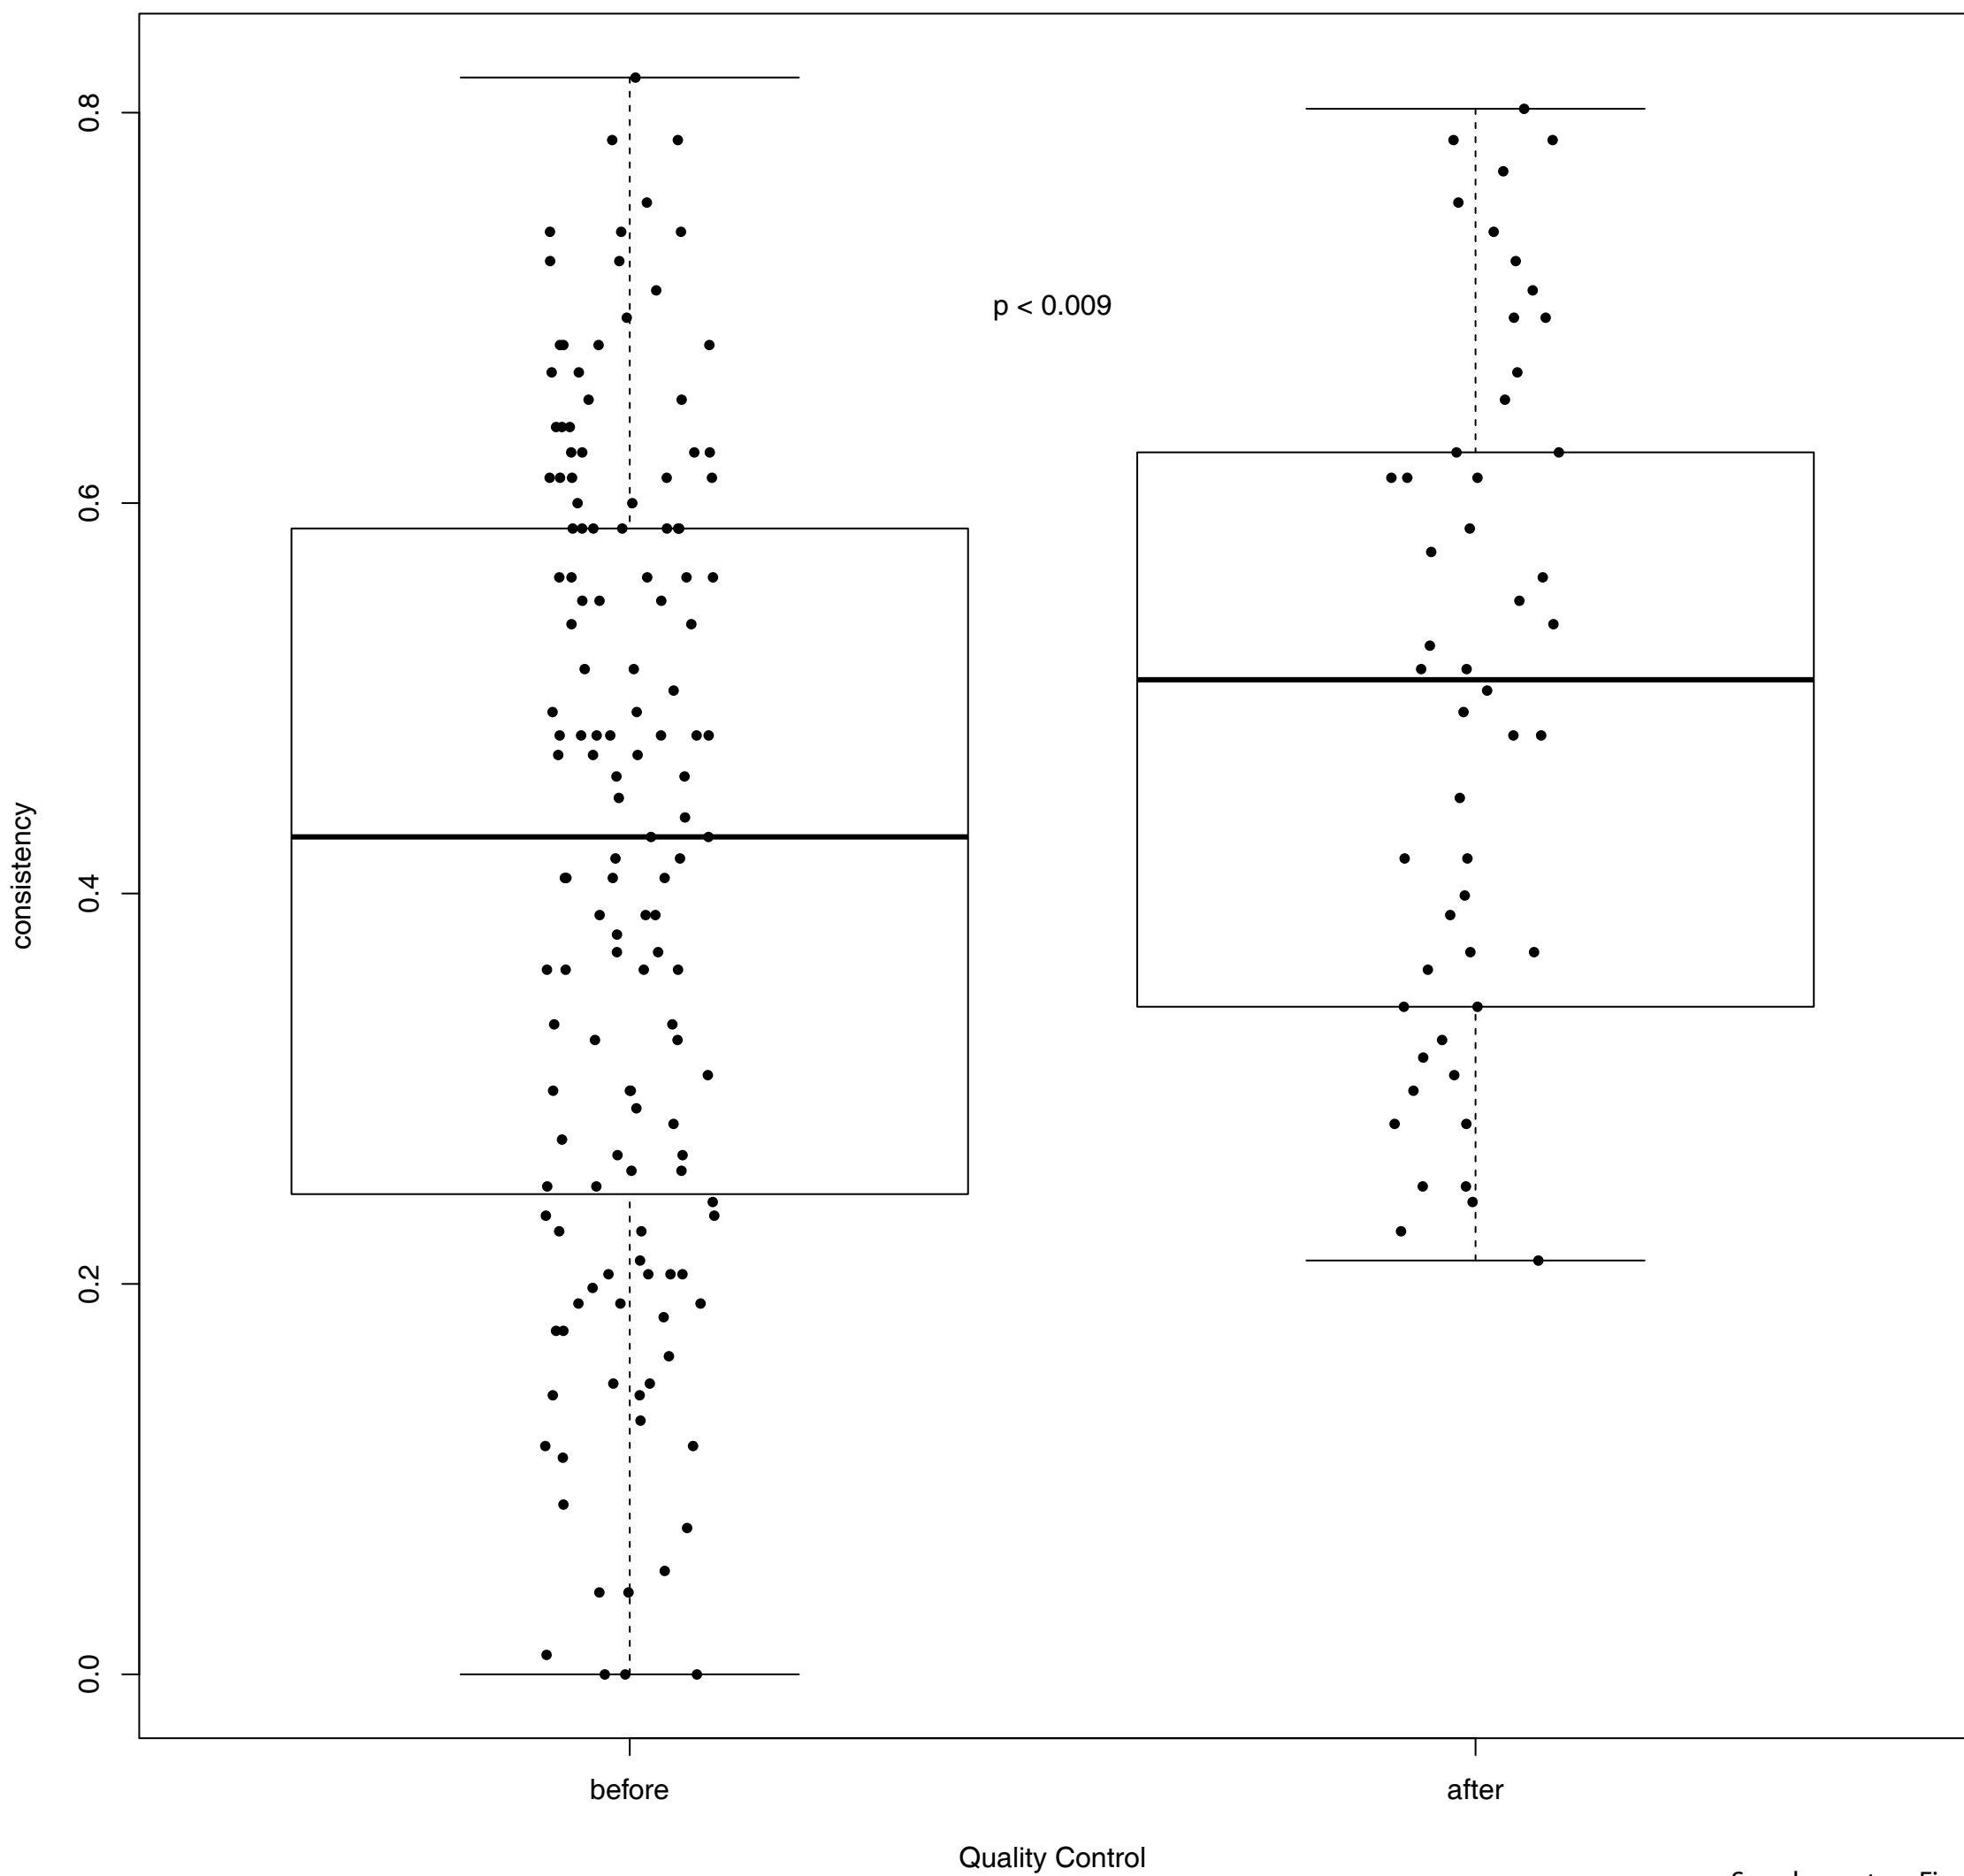

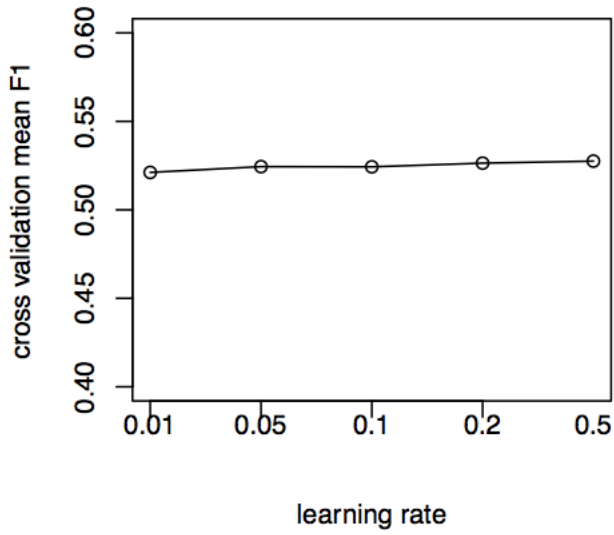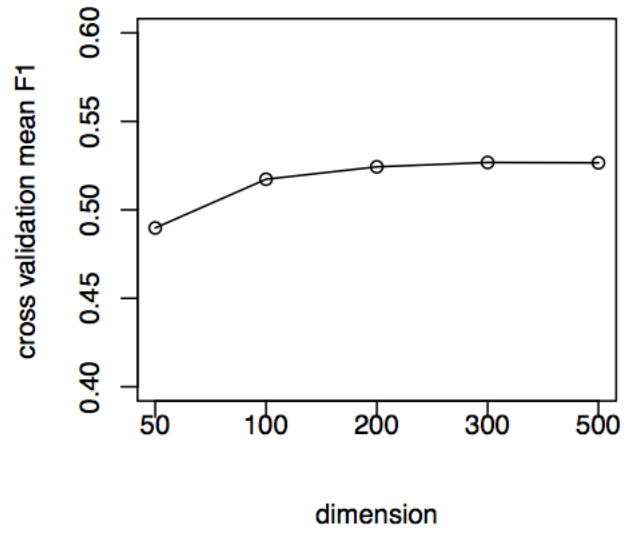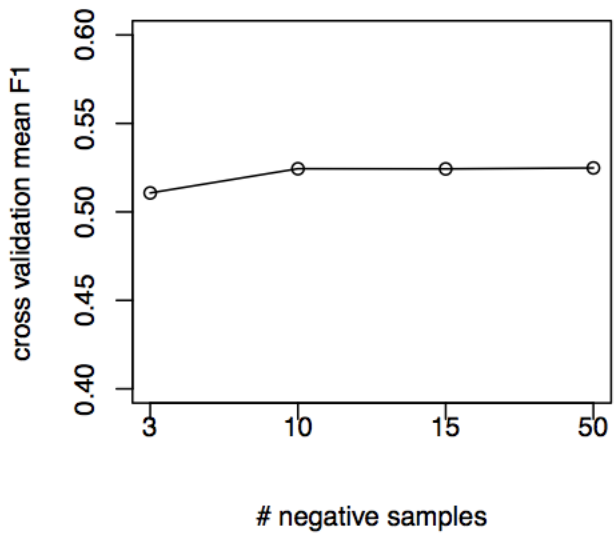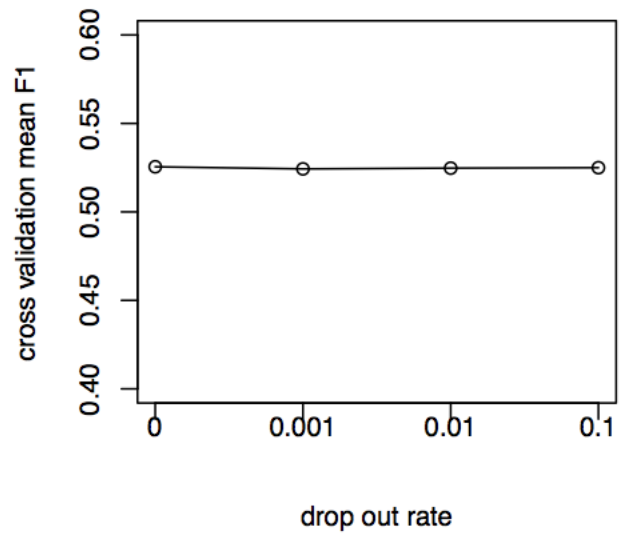

Supplementary Figure 12
